# Supplementary material
Source: publisher figshare collection journal article supplement (https://acs.figshare.com/ndownloader/files/14617184)
Supplement: Supplementary file 1 [file 14617184]

# **Supporting Information**

## **Sol–Gel Derived Benzo-Crown Ether-Functionalized Silica gel for Selective Adsorption of Ca<sup>2+</sup> Ions**

Nan You<sup>1</sup>, Yue -Xian Song<sup>1</sup>, Hai-Rong Wang<sup>2</sup>, Li-Xia Kang<sup>2</sup>, Hong-Tao Fan<sup>1,\*</sup>, Hui  
Yao<sup>2,\*</sup>

(1. College of Chemistry Chemical Engineering, and Environmental Engineering,  
Liaoning SHIHUA University, Fushun 113001, Liaoning, China; 2. College of  
Applied Chemistry, Shenyang University of Chemical Technology, Shenyang,  
100142, Liaoning, China)

\* Corresponding author

E-mail: httyf\_77@163.com (H.-T. Fan) and yaohui7225@sohu.com (H. Yao)

## Supporting Information

### *Adsorption isotherms*

The linearized equations of Langmuir and Freundlich isotherm can be expressed as Eqs. (S1) and (S2), respectively.

$$C_e/q_e = 1/(q_{\max} b) + C_e/q_{\max} \quad (\text{S1})$$

$$\log q_e = \log k_F + (1/n) \log C_e \quad (\text{S2})$$

$$q_e = B_T \ln A_T + B_T \ln C_e \quad (\text{S3})$$

$$B_T = RT/b_T \quad (\text{S4})$$

where  $q_e$  (mg g<sup>-1</sup>) is the amount of Ca<sup>2+</sup> ions adsorbed per unit mass of BCES at equilibrium;  $C_e$  (mg L<sup>-1</sup>) is the concentration at equilibrium;  $q_{\max}$  (mg g<sup>-1</sup>) is the maximum adsorption at monolayer coverage;  $b$  (L mg<sup>-1</sup>) is the adsorption equilibrium constant;  $K_F$  (L g<sup>-1</sup>) is a Freundlich constant;  $n$  is a constant;  $B_T$  and  $b_T$  are the Temkin constant (KJ mol<sup>-1</sup>) which related to heat of adsorption,  $A_T$  is the equilibrium binding constant (mg L<sup>-1</sup>),  $R$  is the universal gas constant (8.314 J mol<sup>-1</sup> K<sup>-1</sup>) and  $T$  (K) is the solution temperature.

### *Kinetic analysis*

The pseudo-first-order and pseudo-second-order rate expressions are linearly expressed as:

$$\log(q_e - q_t) = \log q_e - k_1 t / 2.303 \quad (\text{S5})$$

$$t/q_t = 1/k_2 q_e^2 + t/q_e \quad (\text{S6})$$

where  $k_1$  (min<sup>-1</sup>) is the rate constant of the pseudo-first-order adsorption.  $q_e$  and  $q_t$  (mg g<sup>-1</sup>) are the adsorption capacity at equilibrium and the adsorption amount at time  $t$  (min), respectively.  $k_2$  (g mg<sup>-1</sup> min<sup>-1</sup>) is the rate constant of the pseudo-second-order equation.

The intraparticle diffusion model is linearly expressed as

$$q_t = k_{pi} t^{0.5} + C_{pi} \quad (S7)$$

Where  $k_{pi}$  is the intraparticle diffusion rate constant of stage i ( $\text{mg g}^{-1} \text{min}^{-0.5}$ ),  $C_{pi}$ , the intercept of stage i, gives an idea about the thickness of boundary layer, i.e., the larger of the intercept, the greater of the boundary layer effect.
